# Supplementary material for: Exploring the Efficacy of Benzimidazolone Derivative as Corrosion Inhibitors for Copper in a 3.5 wt.% NaCl Solution: A Comprehensive Experimental and Theoretical Investigation
Source: MDPI journal article supplement (doi:10.3390/molecules28196948), 2023-10-06

## Supplementary Data

# Exploring the Efficacy of Benzimidazolone Derivative as Corrosion Inhibitors for Copper in a 3.5 wt.% NaCl Solution: A Comprehensive Experimental and Theoretical Investigation

Mohamed Adardour <sup>1,\*</sup>, Mohammed Lasri <sup>2</sup>, Marouane Ait Lahcen <sup>1</sup>, Mohamed Maatallah <sup>1</sup>, Rachid Idouhli <sup>2</sup>, Mohamed M. Alanazi <sup>3</sup>, Sanae Lahmidi <sup>4</sup>, Abdesselam Abouelfida <sup>2</sup>, Joel T. Mague <sup>5</sup> and Abdesselam Baouid <sup>1</sup>

<sup>1</sup>Laboratory of Chemistry Molecular, Department of Chemistry, Faculty of Sciences Semlalia, Cadi Ayyad University, B.P. 2390, Marrakech 40001, Morocco; m.aitlahcen.ced@uca.ac.ma (M.A.L.); m.maatallah@uca.ma (M.M.); baouid@uca.ac.ma (A.B.)

<sup>2</sup>Applied Chemistry and Biomass Laboratory, Department of Chemistry, Faculty of Sciences Semlalia, Cadi Ayyad University, B.P. 2390, Marrakech 40001, Morocco; m.lasri.ced@uca.ac.ma (M.L.); rachid.idouhli@uca.ac.ma (R.I.); abouelfida@uca.ac.ma (A.A.)

<sup>3</sup>Department of Pharmaceutical Chemistry, College of Pharmacy, King Saud University, P.O. Box 2457, Riyadh 11451, Saudi Arabia; mmalanazi@ksu.edu.sa

<sup>4</sup>Laboratory of Heterocyclic Organic Chemistry, Department of Chemistry, Faculty of Sciences, Mohammed V University in Rabat, Rabat 10106, Morocco; lahmidi\_sanae@yahoo.fr

<sup>5</sup>Department of Chemistry, Tulane University, New Orleans, LA 70118, USA; joelt@tulane.edu

\* Correspondence: mohamed.adardour@ced.uca.ac.ma

**Figurer S1. <sup>1</sup>H NMR of Compound CHBI**

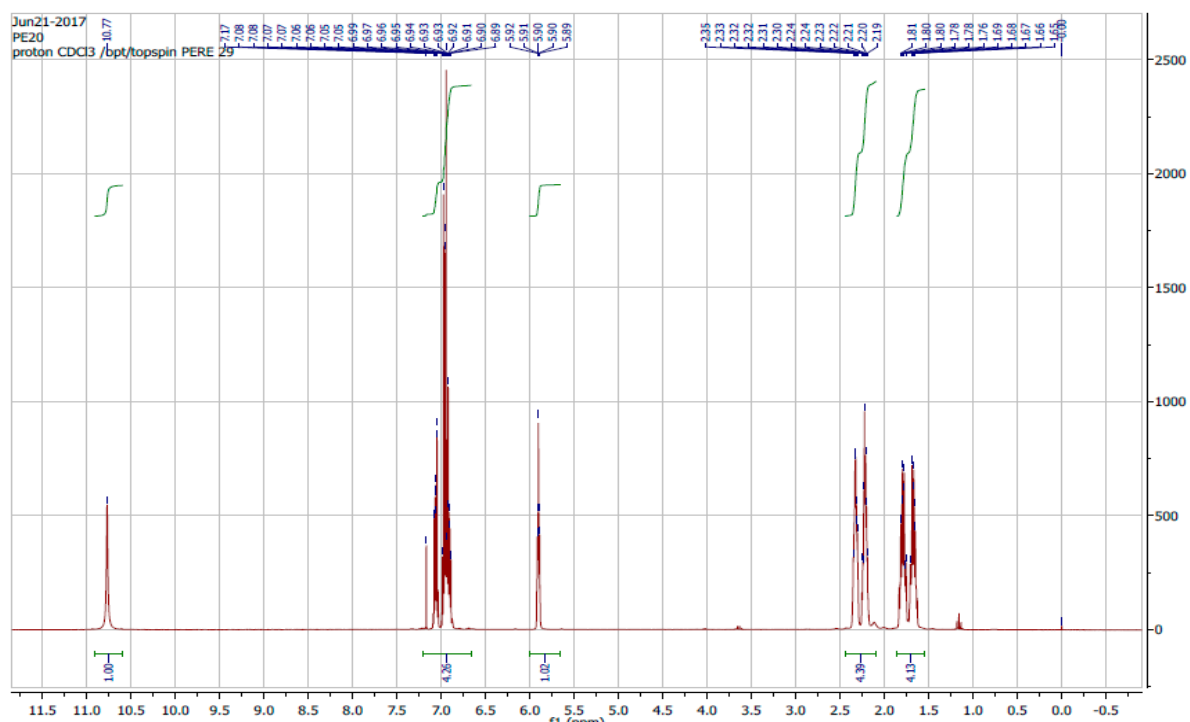

Figure S2.  $^{13}\text{C}$  NMR of Compound CHBI

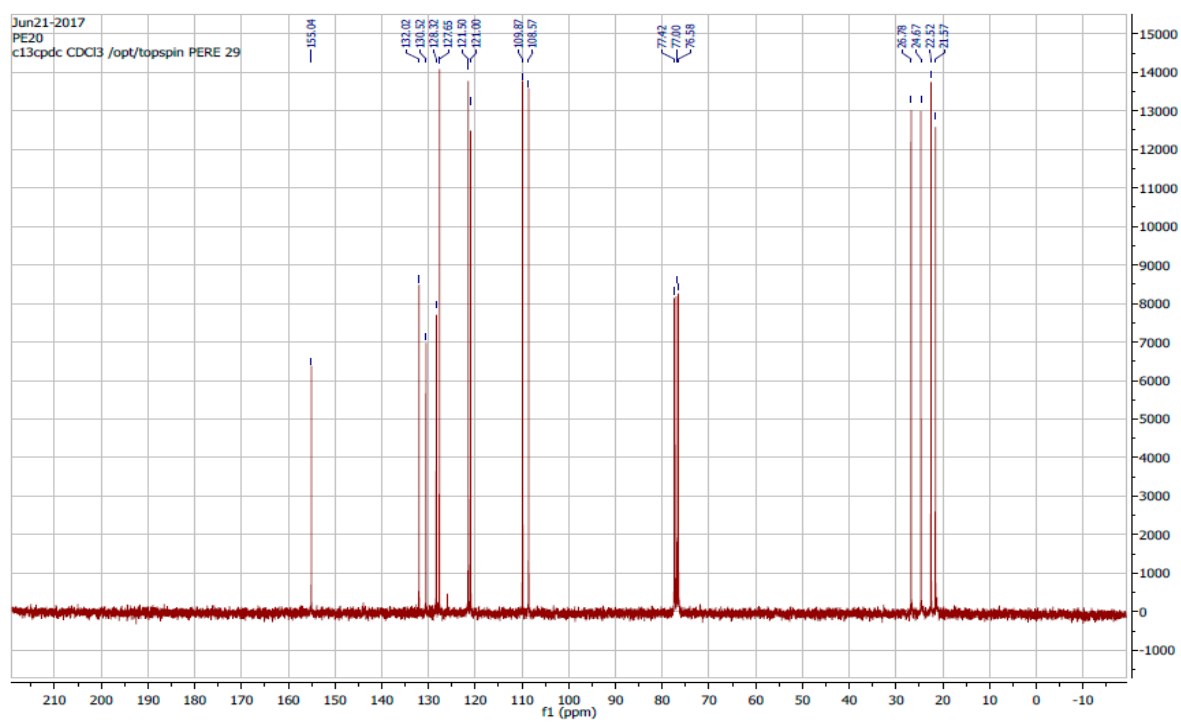

Figure S3. HRMS of Compound CHBI

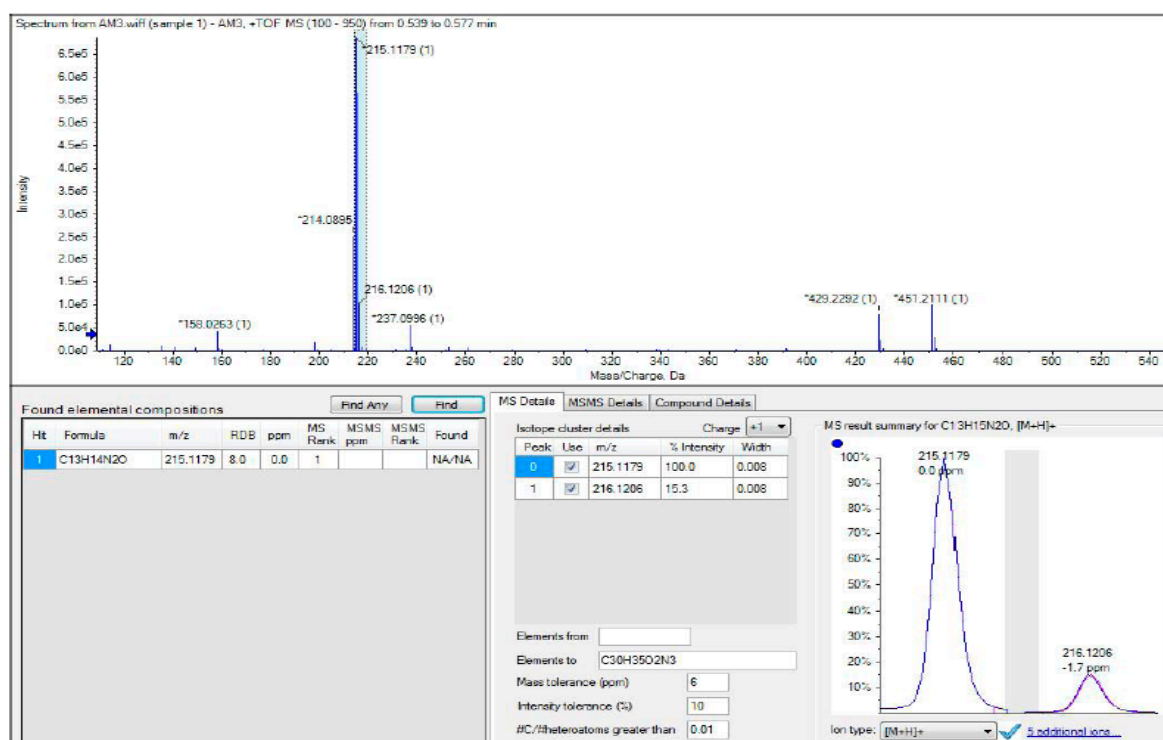

Supplement: s1 [file s1]
